# Supplementary material for: sMEK1 inhibits endothelial cell proliferation by attenuating VEGFR-2-dependent-Akt/eNOS/HIF-1α signaling pathways
Source: PubMed Central journal article supplement (PMC4741643; doi:10.18632/oncotarget.5570), 2015-09-10
Supplement: oncotarget-06-31830-s001.pdf [file oncotarget-06-31830-s001.pdf]

# **sMEK1 inhibits endothelial cell proliferation by attenuating VEGFR-2-dependent-Akt/eNOS/HIF-1 $\alpha$ signaling pathways**

## **Supplementary Material**

### **MATERIALS AND METHODS**

#### **Apoptosis assay**

For the analysis of the DNA content by use of a flow cytometry (FACS), HUVECs were grown onto chamber slides at a density of  $4.5 \times 10^4$  cells per well and were then transfected with sMEK1 for the indicated times relative to that of control cells (untransfected). Cells were incubated with FITC-labeled Annexin V and propidium iodide for 15 min according to the manufacturer's protocols (BD PharMingen, Mississauga, ON) and then were measured with a flow cytometer (FACScalibur, Becton Dickinson, Franklin Lakes, NJ).

#### **RNA interference (RNAi)**

Small interfering RNA (siRNA) oligonucleotide that target vascular endothelial growth factor receptor 2 (VEGFR-2) (ON-TARGET *plus* SMARTpool) and a non-targeting siRNA pool were obtained from Millipore (Billerica, MA) and resuspended according to the supplier's protocols. For transfection, cells were transfected with the oligonucleotides at a final concentration of 100 nM using Lipofectamine<sup>TM</sup> 2000 Reagent (Invitrogen, Carlsbad, CA) according to the manufacturer's instruction.

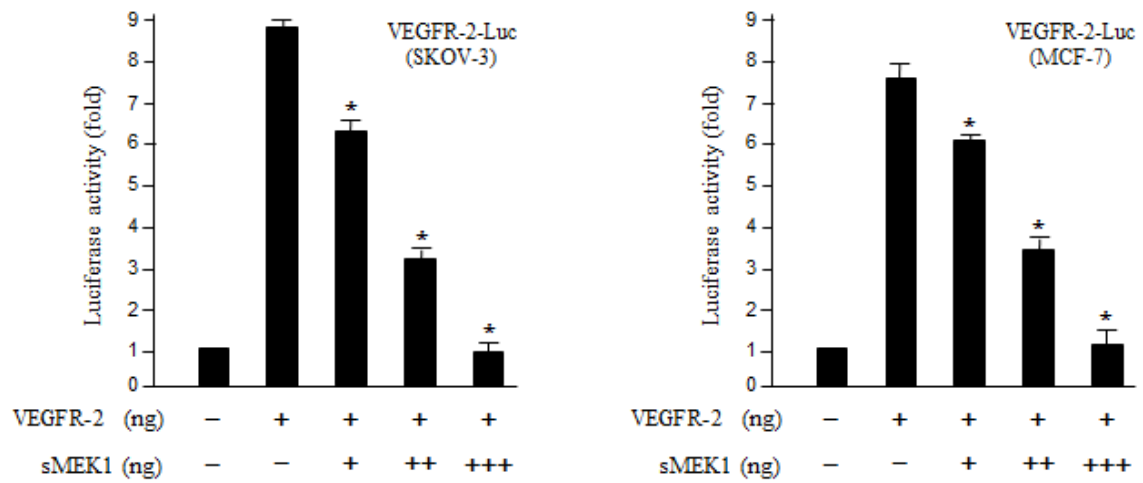

**Fig S1: Inhibition of VEGFR-2-dependent transcription by sMEK1.** Cancer cells (SKOV-3 and MCF-7) were co-transfected with 500 ng of VEGFR-2-Luc, 500 ng of a VEGFR-2 expression plasmid (pcDNA3.1/VEGFR-2), and increasing concentrations of sMEK1 (50, 250, and 500 ng). Each data point represents triplicate samples, and the bars indicate means $\pm$ SDs. \*,  $P < 0.05$  vs. control. The experiments were repeated three times with similar results.

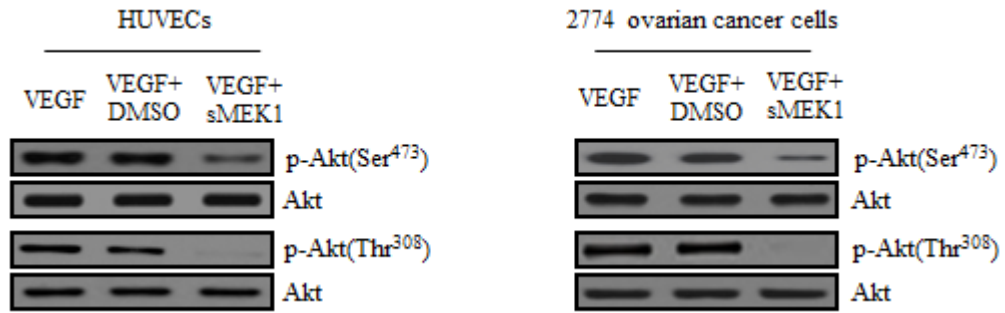

**Fig S2: sMEK1 decreases VEGF-induced Akt phosphorylation.** Cells (HUVECs and 2774 ovarian cancer) were treated with VEGF alone, VEGF plus DMSO, and VEGF plus sMEK1. Total cell extracts were assessed by immunoblot analysis with the indicated phosphor-specific or total-protein antibodies. Results shown are representative of three independent experiments.

HUVECs

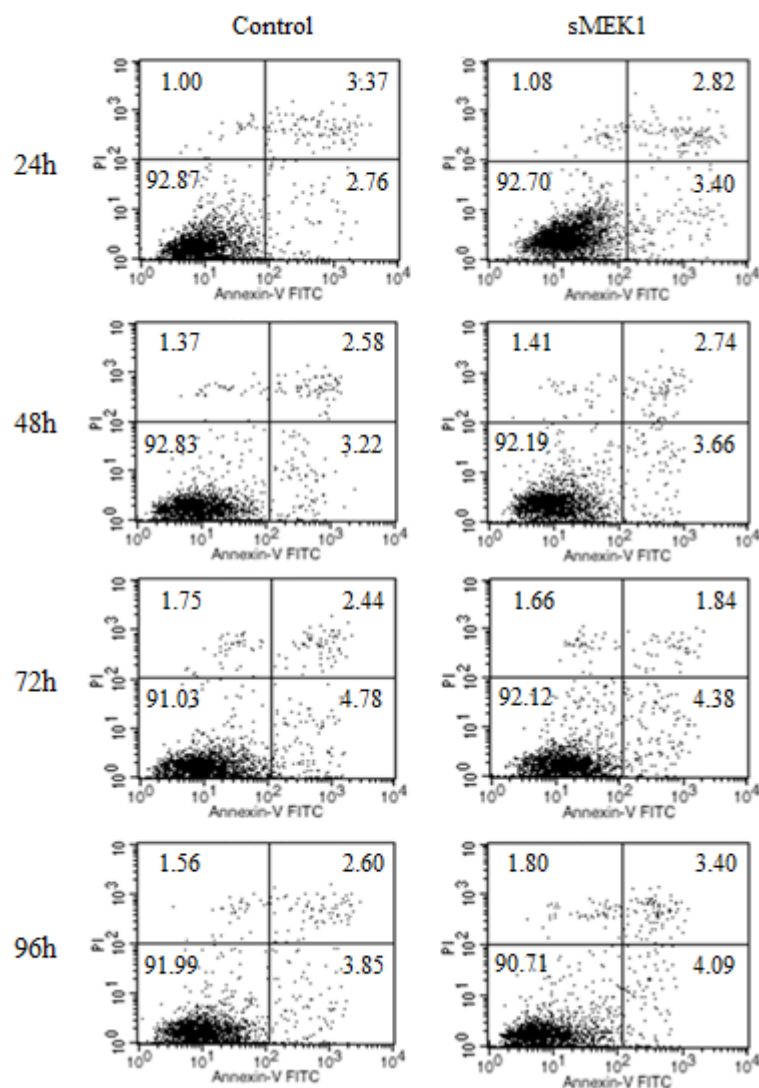

**Fig S3: The growth-inhibitory effects of sMEK1 on HUVECs.** HUVECs were transfected with increasing times of sMEK1, and then analyzed by fluorescein isothiocyanate (FITC)-labeled Annexin V assay. All data shown are representative of three independent experiments.

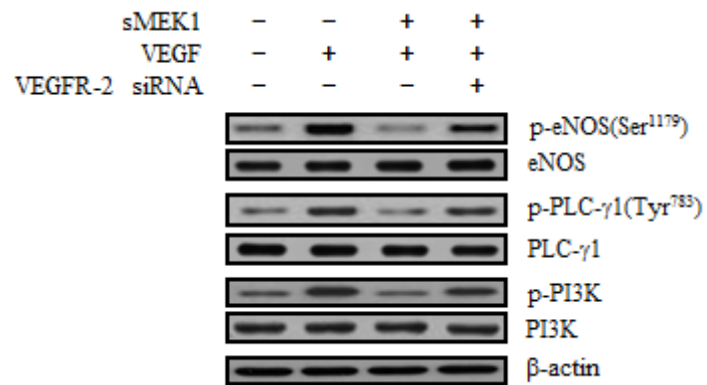

**Fig S4: sMEK1 suppresses VEGF-stimulated PI3K- and downstream signaling components expression of VEGFR-2.** SKOV-3 cells transiently transfected with VEGFR-2 siRNA were incubated with or without 10 ng/ml VEGF. Cells lysates were harvested and analyzed with the indicated antibodies by Western blot analysis. Knockdown of VEGFR-2 recovers VEGF-stimulated downstream regulators expression reduced by sMEK1. Three independent experiments were conducted in triplicate.

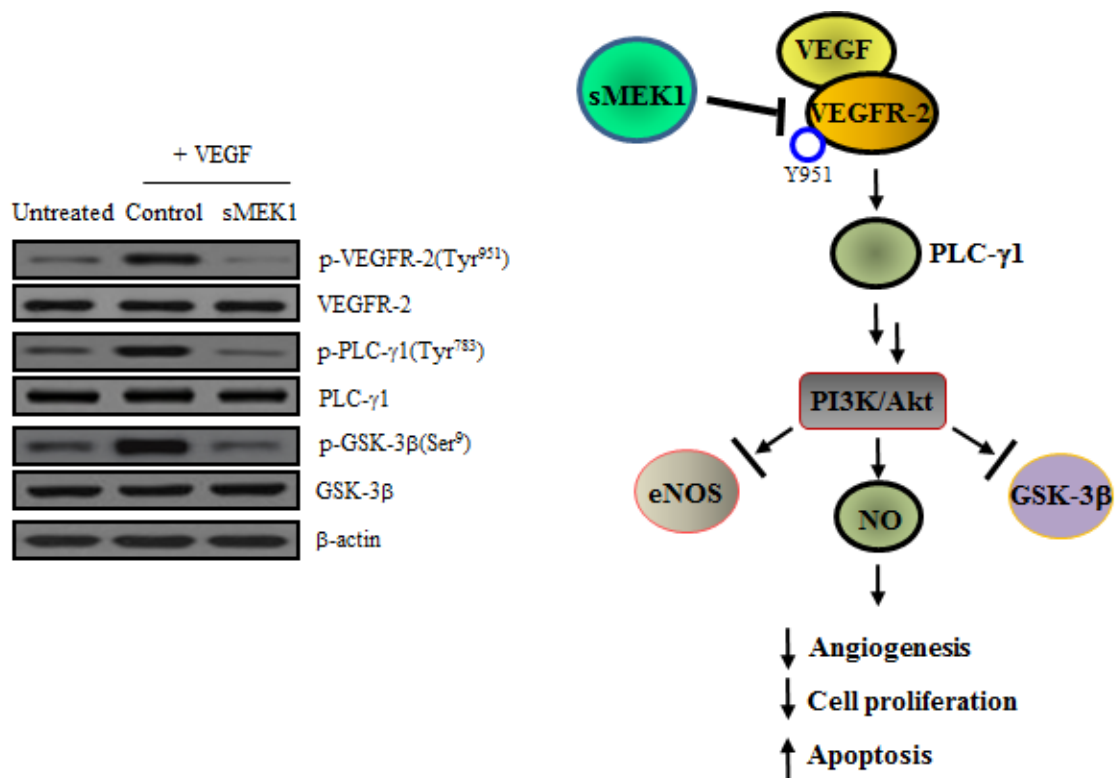

**Fig S5: sMEK1 inhibits VEGF-induced VEGFR-2, PLC-γ1, and GSK-3β phosphorylation.** Cells were treated with VEGF untreated, VEGF alone, or VEGF plus sMEK1. VEGF-induced phosphorylation of VEGFR-2, PLC-γ1, and GSK-3β was detected with anti-phospho-VEGFR-2(Tyr<sup>951</sup>), anti-phospho-PLC-γ1(Tyr<sup>783</sup>), and anti-phospho-GSK-3β(Ser<sup>9</sup>) antibody, respectively. Unphosphorylated blot was used as loading control (indicated as VEGFR-2, PLC-γ1, GSK-3β, and β-actin). Results shown are representative of three independent experiments (left panel). Schematic diagrams for interruption of the phosphorylation of signaling components such as HIF-1α, p-eNOS, p-VEGFR-2 and p-Akt by the sMEK1 tumor suppressor protein (right panel).
